# Supplementary material
Source: publisher figshare collection journal article supplement (https://gsapubs.figshare.com/ndownloader/files/22411518)
Supplement: Supplementary file 1 [file 22411518]

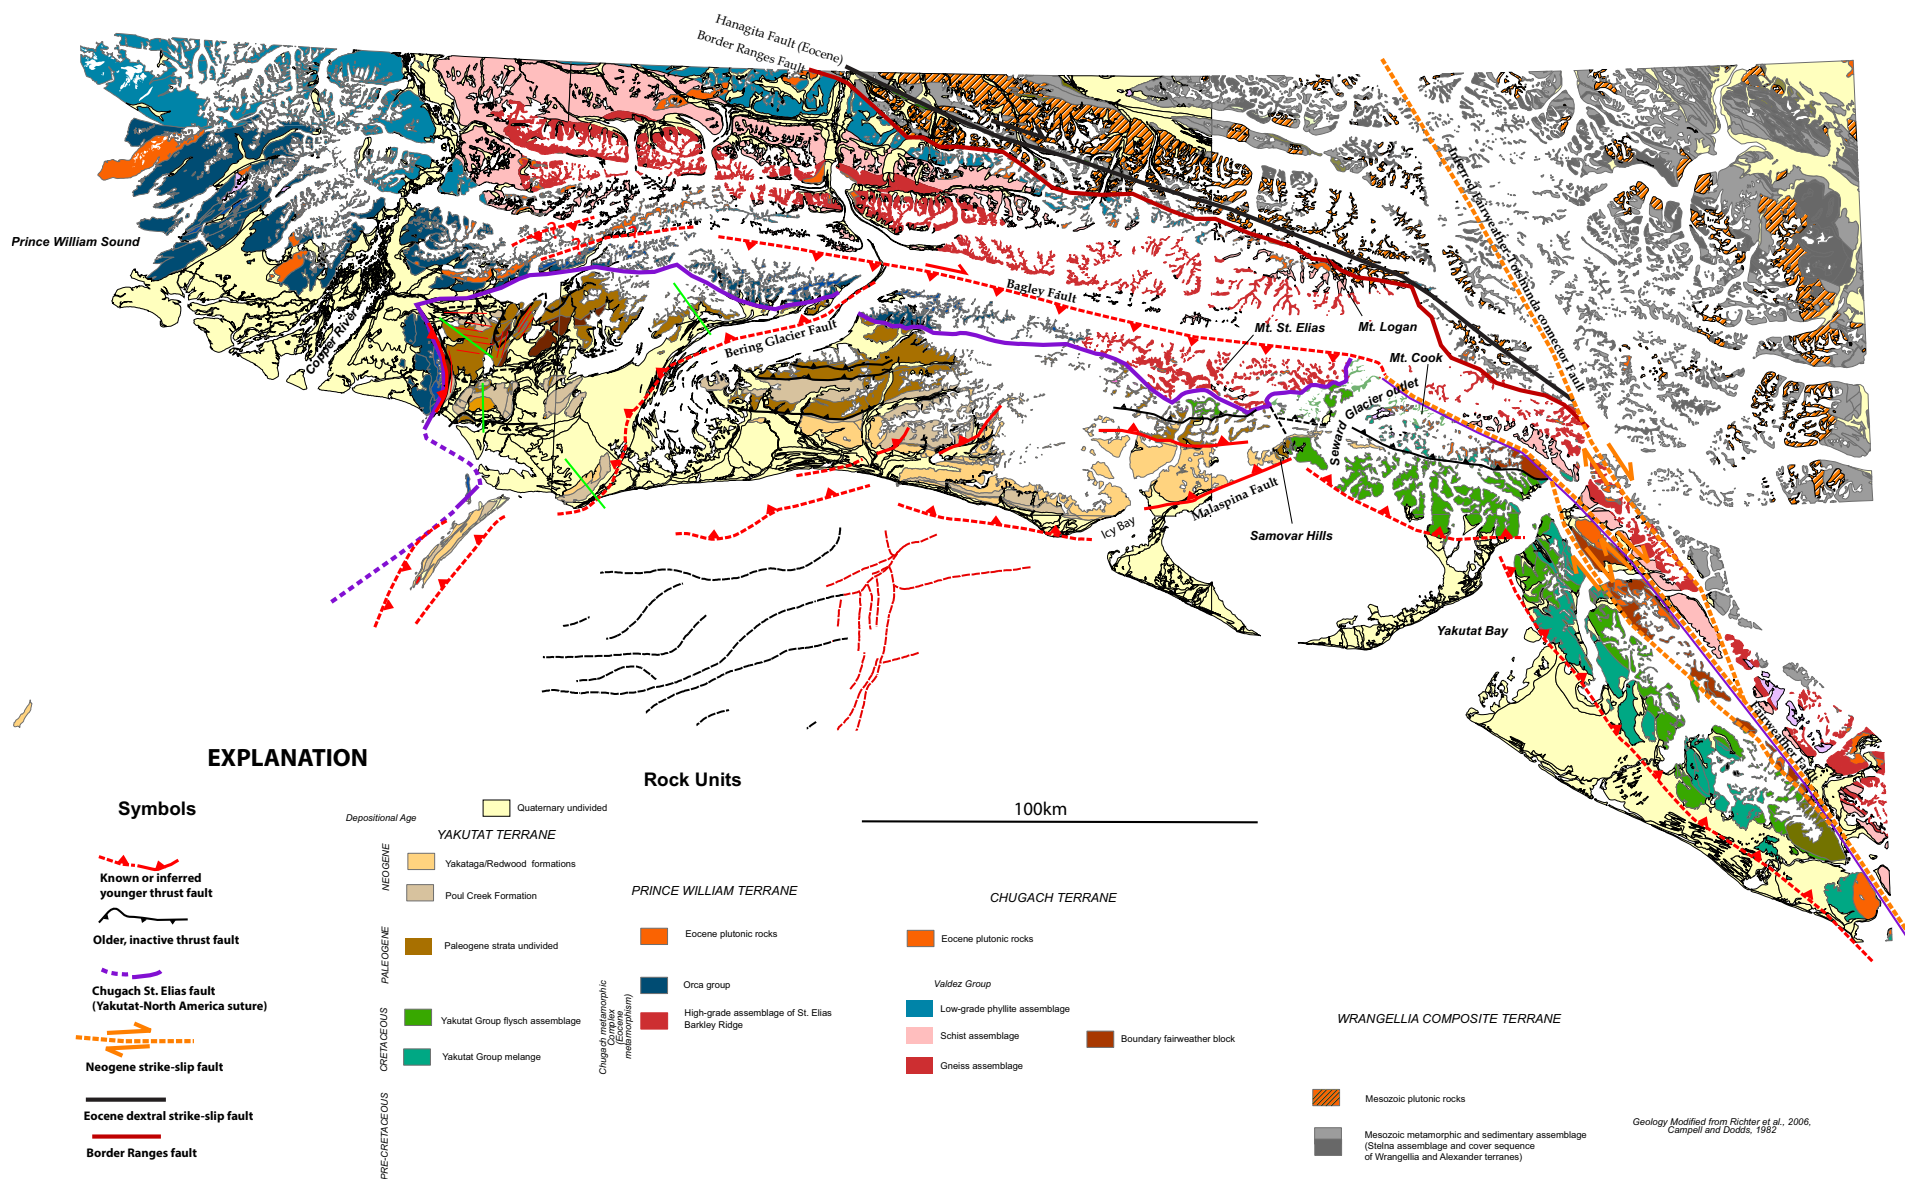

To view the figure's seven layers in the PDF version of this paper, open the PDF in Adobe Acrobat or Adobe Reader. To view the layers while reading the full-text version of the paper, click <https://doi.org/10.1130/GES01488.I2> to download a PDF of the figure.

Figure 2. Geologic map of the Yakutat microplate. Symbols and rock units are defined in the legend. This figure is a layered PDF. The layer tags provide an expanded legend from that on the base map. To view the figure's seven layers in the PDF version of this paper, open the PDF in Adobe Acrobat or Adobe Reader. To view the layers while reading the full-text version of the paper, click <https://doi.org/10.1130/GES01488.I2> to download a PDF of the figure. Map was prepared from geographic information system (GIS) files of Wilson et al. (2005) and our digitization of the St. Elias region from mapping by Campbell and Dodds (1982).
